# Supplementary material for: A Time-Varying Effect Model (TVEM) of the Complex Association of Tobacco Use and Smoke Exposure on Mean Telomere Length: Differences between Racial and Ethnic Groups Assessed in the National Health and Nutrition Examination Survey
Source: MDPI journal article supplement (doi:10.3390/ijerph191711069), 2022-09-04
Supplement: s1 [file s1]

Supplementary Table S1. Sample sociodemographic variables by race/ethnicity (N = 7826).

|                             | Mexican American |     | Other Hispanic |     | Non-Hispanic White |      | Non-Hispanic Black |     | Other Race/Multiracial |     | Total |      |
|-----------------------------|------------------|-----|----------------|-----|--------------------|------|--------------------|-----|------------------------|-----|-------|------|
|                             | N                | %   | N              | %   | N                  | %    | N                  | %   | N                      | %   | N     | %    |
| Sex                         |                  |     |                |     |                    |      |                    |     |                        |     |       |      |
| Female                      | 971              | 3.3 | 229            | 3.6 | 2026               | 37.2 | 698                | 5.1 | 132                    | 2.1 | 4056  | 51.4 |
| Male                        | 904              | 3.7 | 188            | 3.2 | 1939               | 35.7 | 635                | 4.2 | 104                    | 1.9 | 3770  | 48.6 |
| Education                   |                  |     |                |     |                    |      |                    |     |                        |     |       |      |
| High school degree or above | 703              | 3.1 | 230            | 4.4 | 3262               | 62.0 | 799                | 6.0 | 181                    | 3.1 | 5175  | 78.6 |
| Below high school           | 1169             | 3.8 | 185            | 2.4 | 698                | 11.0 | 532                | 3.3 | 55                     | 0.9 | 2639  | 21.4 |
| Poverty-income-ratio        |                  |     |                |     |                    |      |                    |     |                        |     |       |      |
| Above poverty level         | 1229             | 4.7 | 257            | 4.4 | 3292               | 61.4 | 883                | 6.2 | 164                    | 2.7 | 5825  | 79.2 |
| At or below poverty level   | 646              | 2.3 | 160            | 2.4 | 673                | 11.5 | 450                | 3.1 | 72                     | 1.3 | 2001  | 20.8 |
| Lifetime cigarette smoker   |                  |     |                |     |                    |      |                    |     |                        |     |       |      |
| No                          | 1066             | 4.1 | 238            | 3.8 | 1862               | 34.7 | 714                | 5.2 | 135                    | 2.3 | 4015  | 50.1 |
| Yes                         | 805              | 2.9 | 178            | 3.0 | 2098               | 38.2 | 617                | 4.1 | 98                     | 1.7 | 3796  | 49.9 |
